# Supplementary material for: Global Spread and Molecular Characterization of CTX-M-Producing Salmonella Typhimurium Isolates
Source: MDPI journal article supplement (doi:10.3390/antibiotics10111417), 2021-11-19
Supplement: s1 [file s1]

**Table S1.** The detection rate of 154 virulence genes in 330 *bla*<sub>CTX-M</sub>-positive *S. Typhimurium* isolates.

| Virulence Gene | Rate   | Virulence Gene | Rate   | Virulence Gene | Rate  | Virulence Gene | Rate |
|----------------|--------|----------------|--------|----------------|-------|----------------|------|
| <i>csgA</i>    | 100.0% | <i>sscA</i>    | 100.0% | <i>sifB</i>    | 99.4% | <i>iucD</i>    | 3.0% |
| <i>csgB</i>    | 100.0% | <i>sscB</i>    | 100.0% | <i>sipB</i>    | 99.4% | <i>iutA</i>    | 3.0% |
| <i>csgC</i>    | 100.0% | <i>sseA</i>    | 100.0% | <i>sopA</i>    | 99.4% | <i>iroB</i>    | 1.8% |
| <i>csgF</i>    | 100.0% | <i>sseF</i>    | 100.0% | <i>sopE2</i>   | 99.4% | <i>iroC</i>    | 1.8% |
| <i>csgG</i>    | 100.0% | <i>sseG</i>    | 100.0% | <i>sptP</i>    | 99.4% | <i>iroD</i>    | 1.8% |
| <i>fepG</i>    | 100.0% | <i>steA</i>    | 100.0% | <i>csgD</i>    | 99.1% | <i>iroE</i>    | 1.8% |
| <i>fimC</i>    | 100.0% | <i>csgE</i>    | 99.7%  | <i>lpfA</i>    | 99.1% | <i>iroN</i>    | 1.8% |
| <i>fimD</i>    | 100.0% | <i>entA</i>    | 99.7%  | <i>lpfD</i>    | 99.1% | <i>cdtB</i>    | 0.6% |
| <i>invA</i>    | 100.0% | <i>fimF</i>    | 99.7%  | <i>sinH</i>    | 99.1% | <i>faeD</i>    | 0.6% |
| <i>invB</i>    | 100.0% | <i>invI</i>    | 99.7%  | <i>ssaD</i>    | 99.1% | <i>faeE</i>    | 0.6% |
| <i>invC</i>    | 100.0% | <i>invJ</i>    | 99.7%  | <i>sseJ</i>    | 99.1% | <i>sspH1</i>   | 0.6% |
| <i>invE</i>    | 100.0% | <i>misL</i>    | 99.7%  | <i>steC</i>    | 99.1% | <i>ybtP</i>    | 0.6% |
| <i>invF</i>    | 100.0% | <i>orgC</i>    | 99.7%  | <i>ssaV</i>    | 98.8% | <i>ybtQ</i>    | 0.6% |
| <i>invG</i>    | 100.0% | <i>pipB</i>    | 99.7%  | <i>sseC</i>    | 98.8% | <i>ybtS</i>    | 0.6% |
| <i>invH</i>    | 100.0% | <i>prgH</i>    | 99.7%  | <i>ratB</i>    | 98.5% | <i>ybtX</i>    | 0.6% |
| <i>mgtB</i>    | 100.0% | <i>sifA</i>    | 99.7%  | <i>slrP</i>    | 98.5% | <i>entE</i>    | 0.3% |
| <i>mgtC</i>    | 100.0% | <i>sipC</i>    | 99.7%  | <i>entB</i>    | 98.2% | <i>faeC</i>    | 0.3% |
| <i>ompA</i>    | 100.0% | <i>sipD</i>    | 99.7%  | <i>sodCI</i>   | 98.2% | <i>fyuA</i>    | 0.3% |
| <i>orgA</i>    | 100.0% | <i>sopB</i>    | 99.7%  | <i>sseL</i>    | 98.2% | <i>irp1</i>    | 0.3% |
| <i>orgB</i>    | 100.0% | <i>sopD</i>    | 99.7%  | <i>sopD2</i>   | 97.9% | <i>irp2</i>    | 0.3% |
| <i>prgI</i>    | 100.0% | <i>spaO</i>    | 99.7%  | <i>mig-14</i>  | 97.6% | <i>senB</i>    | 0.3% |
| <i>prgJ</i>    | 100.0% | <i>spaR</i>    | 99.7%  | <i>sseK2</i>   | 96.7% | <i>tviB</i>    | 0.3% |
| <i>prgK</i>    | 100.0% | <i>ssaC</i>    | 99.7%  | <i>sseK1</i>   | 96.1% | <i>tviC</i>    | 0.3% |
| <i>sicA</i>    | 100.0% | <i>ssaM</i>    | 99.7%  | <i>gogB</i>    | 91.8% | <i>tviD</i>    | 0.3% |
| <i>sicP</i>    | 100.0% | <i>ssaN</i>    | 99.7%  | <i>pipB2</i>   | 89.4% | <i>tviE</i>    | 0.3% |
| <i>sipA</i>    | 100.0% | <i>ssaP</i>    | 99.7%  | <i>sspH2</i>   | 83.0% | <i>vexA</i>    | 0.3% |
| <i>spaP</i>    | 100.0% | <i>ssaQ</i>    | 99.7%  | <i>sseI</i>    | 79.7% | <i>vexB</i>    | 0.3% |
| <i>spaQ</i>    | 100.0% | <i>ssaR</i>    | 99.7%  | <i>grvA</i>    | 31.8% | <i>vexC</i>    | 0.3% |
| <i>spaS</i>    | 100.0% | <i>ssaT</i>    | 99.7%  | <i>spvB</i>    | 27.0% | <i>vexD</i>    | 0.3% |
| <i>spiC</i>    | 100.0% | <i>sseB</i>    | 99.7%  | <i>spvC</i>    | 27.0% | <i>vexE</i>    | 0.3% |
| <i>ssaE</i>    | 100.0% | <i>sseD</i>    | 99.7%  | <i>spvR</i>    | 27.0% | <i>ybtA</i>    | 0.3% |
| <i>ssaG</i>    | 100.0% | <i>sseE</i>    | 99.7%  | <i>pefA</i>    | 26.7% | <i>ybtE</i>    | 0.3% |
| <i>ssaH</i>    | 100.0% | <i>steB</i>    | 99.7%  | <i>pefB</i>    | 26.7% | <i>ybtT</i>    | 0.3% |
| <i>ssaI</i>    | 100.0% | <i>avrA</i>    | 99.4%  | <i>pefC</i>    | 26.7% | <i>ybtU</i>    | 0.3% |
| <i>ssaJ</i>    | 100.0% | <i>fepC</i>    | 99.4%  | <i>pefD</i>    | 26.7% |                |      |
| <i>ssaK</i>    | 100.0% | <i>fimH</i>    | 99.4%  | <i>rck</i>     | 26.4% |                |      |
| <i>ssaL</i>    | 100.0% | <i>fimI</i>    | 99.4%  | <i>shdA</i>    | 9.1%  |                |      |
| <i>ssaO</i>    | 100.0% | <i>lpfB</i>    | 99.4%  | <i>iucA</i>    | 3.0%  |                |      |
| <i>ssaS</i>    | 100.0% | <i>lpfC</i>    | 99.4%  | <i>iucB</i>    | 3.0%  |                |      |
| <i>ssaU</i>    | 100.0% | <i>lpfE</i>    | 99.4%  | <i>iucC</i>    | 3.0%  |                |      |

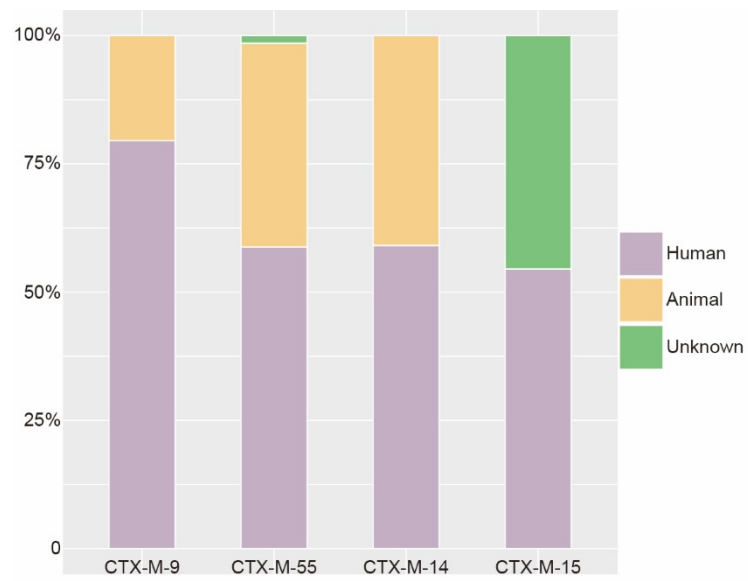

**Figure S1.** The analysis of hosts carrying the most common CTX-M allelic variants.
